# Supplementary material
Source: PubMed Central journal article supplement (PMC10293088)
Supplement: NIHMS1883970-supplement-1.pdf [file NIHMS1883970-supplement-1.pdf]

## **APPENDIX**

**The Influence of Social Determinants on Cancer Screening in a Medicaid Sample**

**Anne R. Markus, Yixuan Li, Marcéé E. Wilder, Jillian Catalanotti, Melissa L. McCarthy**

*American Journal of Preventive Medicine*

**Supplemental Table 1. Definitions for Inclusion and Exclusion Criteria, and Cancer Screening Services.**

| Conditions                            | Definitions                                                                                                                                                                                                                                                                                                                    |
|---------------------------------------|--------------------------------------------------------------------------------------------------------------------------------------------------------------------------------------------------------------------------------------------------------------------------------------------------------------------------------|
| <b>A. Colorectal Cancer Screening</b> |                                                                                                                                                                                                                                                                                                                                |
| Inclusion Criteria                    | Age between 50 and 75 years at beginning of study period (i.e. two years prior to study enrollment)                                                                                                                                                                                                                            |
| Exclusion Criteria*                   | History of a diagnosis of colorectal cancer (any of the following):<br>1. ICD-10 codes: C18.0-C18.9, C19, C20, C21.2, C21.8, C78.5, Z85.038, Z85.048<br>2. HCPCS codes: G0213, G0214, G0215, G0231                                                                                                                             |
|                                       | History of total colectomy (any of the following):<br>1. CPT codes: 44150-44153, 44155-44158, 44210-44212<br>2. ICD-10-CM procedure codes: 0DTE0ZZ, 0DTE4ZZ, 0DTE7ZZ, 0DTE8ZZ                                                                                                                                                  |
| Colorectal Cancer Screening Services* | Any of the following CPT/HCPCS codes:<br>1. Colonoscopy: 44388-44394, 44397, 44401-44408, 45355, 45378-45393, 45398<br>2. Flexible Sigmoidoscopy: 45330-45335, 45337-45342, 45345-45347, 45349, 45350<br>3. FOBT: 82270, 82274, G0328<br>4. FIT: 81528<br>5. CT colonography: 74261-74263                                      |
| <b>B. Breast Cancer Screening</b>     |                                                                                                                                                                                                                                                                                                                                |
| Inclusion Criteria*                   | Female sex<br>Age between 50 and 74 years at beginning of study period (i.e. two years prior to study enrollment)                                                                                                                                                                                                              |
| Exclusion Criteria*                   | History of bilateral mastectomy (any of the following):<br>1. ICD-10 codes: Z90.13 or Z90.11(left) and Z90.12 (right)<br>2. ICD-10-CM procedure codes: 0HTV0ZZ or 0HTU0ZZ (left) and 0HTT0ZZ (right)<br>3. CPT codes: 19180, 19200, 19220, 19240, 19303-19307 with Modifiers bilateral (50, 09950) or tight (RT) and left (LT) |
| Mammogram Screening Services*         | CPT/HCPCS codes: 77055-77057, 77061-77063, 77065-77067, G0202-G0204, G0206                                                                                                                                                                                                                                                     |

**Supplemental Table 1 Continued.**

| Conditions                          | Definitions                                                                                                                                                                                                                                                                                                                                                                                                         |
|-------------------------------------|---------------------------------------------------------------------------------------------------------------------------------------------------------------------------------------------------------------------------------------------------------------------------------------------------------------------------------------------------------------------------------------------------------------------|
| <b>C. Cervical Cancer Screening</b> |                                                                                                                                                                                                                                                                                                                                                                                                                     |
| Inclusion Criteria*                 | Female sex<br>Age between 21 and 64 years at beginning of study period (i.e. two years prior to study enrollment)                                                                                                                                                                                                                                                                                                   |
| Exclusion Criteria*                 | History of hysterectomy (any of the following):<br>1. ICD-10 codes: Q51.5, Z90.710, Z90.712<br>2. ICD-10-CM procedure codes: 0UTC0ZZ, 0UTC4ZZ, 0UTC7ZZ, 0UTC8ZZ<br>3. CPT codes: 51925, 56308, 57540, 57545, 57550, 57555, 57556, 58150, 58152, 58200, 58210, 58240, 58260, 58262, 58263, 58267, 58270, 58275, 58280, 58285, 58290-58294, 58548, 58550, 58552-58554, 58570-58573, 58951, 58953, 58954, 58956, 59135 |
| Cervical Cancer Screening Services* | Cervical Cytology CPT/HCPCS codes: 88141-88143, 88147, 88148, 88150, 88152, 88153, 88154, 88164-88167, 88174, 88175, G0123, G0124, G0141, G0143-G0145, G0147, G0148, P3000, P3001, Q0091                                                                                                                                                                                                                            |

\*According to 2018 HEDIS guidelines.

**Supplemental Table 2. Distribution Of Social Risk Group By Other Risk Factors For Breast and Cervical Cancer.**

| Risk Factors <sup>a</sup>                 | Social Risk Group |                          |                  |                  |                         |
|-------------------------------------------|-------------------|--------------------------|------------------|------------------|-------------------------|
|                                           | Overall           | Group 1<br>(least risks) | Group 2          | Group 3          | Group 4<br>(Most risks) |
| <b>A. Breast Cancer (N=1,156)</b>         |                   |                          |                  |                  |                         |
| Age <sup>b</sup>                          |                   |                          |                  |                  |                         |
| 50-54 years old                           | 530 (46%)         | 161 (46%)                | 107 (47%)        | 199 (43%)        | 63 (53%)                |
| 55-59 years old                           | 450 (39%)         | 127 (36%)                | 84 (37%)         | 193 (42%)        | 46 (38%)                |
| 60 - 62 years old                         | 176 (15%)         | 62 (18%)                 | 36 (16%)         | 67 (15%)         | 11 (9%)                 |
| Medicaid Coverage During Study Period     |                   |                          |                  |                  |                         |
| < 4 years                                 | 299 (26%)         | 84 (24%)                 | 71 (31%)         | 113 (25%)        | 31 (26%)                |
| 4 years                                   | 857 (74%)         | 266 (76%)                | 156 (69%)        | 346 (75%)        | 89 (74%)                |
| Regular Medical Provider                  |                   |                          |                  |                  |                         |
| No                                        | 114 (10%)         | <b>24 (7%)</b>           | <b>29 (13%)</b>  | <b>43 (9%)</b>   | <b>18 (15%)</b>         |
| Yes                                       | 1037 (90%)        | <b>325 (93%)</b>         | <b>197 (87%)</b> | <b>413 (90%)</b> | <b>102 (85%)</b>        |
| Adjusted Clinical Groups                  |                   |                          |                  |                  |                         |
| 1st quartile (healthiest)                 | 111 (10%)         | <b>48 (14%)</b>          | <b>23 (10%)</b>  | <b>35 (8%)</b>   | <b>5 (4%)</b>           |
| 2nd quartile                              | 197 (17%)         | <b>79 (23%)</b>          | <b>42 (19%)</b>  | <b>62 (14%)</b>  | <b>14 (12%)</b>         |
| 3rd quartile                              | 320 (28%)         | <b>111 (32%)</b>         | <b>77 (34%)</b>  | <b>106 (23%)</b> | <b>26 (22%)</b>         |
| 4th quartile (sickest)                    | 528 (46%)         | <b>112 (32%)</b>         | <b>85 (37%)</b>  | <b>256 (56%)</b> | <b>75 (63%)</b>         |
| Area Deprivation Index (ADI) <sup>c</sup> |                   |                          |                  |                  |                         |
| 1st quartile                              | 277 (24%)         | <b>104 (30%)</b>         | <b>37 (16%)</b>  | <b>106 (23%)</b> | <b>30 (25%)</b>         |
| 2nd quartile                              | 249 (22%)         | <b>63 (18%)</b>          | <b>59 (26%)</b>  | <b>100 (22%)</b> | <b>27 (23%)</b>         |
| 3rd quartile                              | 283 (24%)         | <b>87 (25%)</b>          | <b>59 (26%)</b>  | <b>106 (23%)</b> | <b>31 (26%)</b>         |
| 4th quartile                              | 283 (24%)         | <b>78 (22%)</b>          | <b>58 (26%)</b>  | <b>123 (27%)</b> | <b>24 (20%)</b>         |

**Supplemental Table 2 Continued.**

|                                           | Social Risk Group |                          |                  |                  |                         |
|-------------------------------------------|-------------------|--------------------------|------------------|------------------|-------------------------|
|                                           | Overall           | Group 1<br>(least risks) | Group 2          | Group 3          | Group 4<br>(Most risks) |
| <b>B. Cervical Cancer (N=5,068)</b>       |                   |                          |                  |                  |                         |
| Age <sup>b</sup>                          |                   |                          |                  |                  |                         |
| 21 - 29 years old                         | 2018 (40%)        | <b>1162 (49%)</b>        | <b>453 (38%)</b> | <b>299 (27%)</b> | <b>104 (28%)</b>        |
| 30 - 39 years old                         | 1179 (23%)        | <b>577 (24%)</b>         | <b>315 (26%)</b> | <b>197 (18%)</b> | <b>90 (24%)</b>         |
| 40 - 49 years old                         | 793 (16%)         | <b>336 (14%)</b>         | <b>208 (17%)</b> | <b>185 (17%)</b> | <b>64 (17%)</b>         |
| 50 - 62 years old                         | 1078 (21%)        | <b>321 (13%)</b>         | <b>214 (18%)</b> | <b>429 (39%)</b> | <b>114 (31%)</b>        |
| Medicaid Coverage During Study Period     |                   |                          |                  |                  |                         |
| < 4 years                                 | 1467 (29%)        | 683 (29%)                | 363 (31%)        | 300 (27%)        | 121 (33%)               |
| 4 years                                   | 3601 (71%)        | 1713 (71%)               | 827 (70%)        | 810 (73%)        | 251 (67%)               |
| Regular Medical Provider                  |                   |                          |                  |                  |                         |
| No                                        | 884 (17%)         | <b>361 (15%)</b>         | <b>228 (19%)</b> | <b>201 (18%)</b> | <b>94 (25%)</b>         |
| Yes                                       | 4165 (82%)        | <b>2030 (85%)</b>        | <b>955 (80%)</b> | <b>905 (82%)</b> | <b>275 (74%)</b>        |
| Adjusted Clinical Groups                  |                   |                          |                  |                  |                         |
| 1st quartile (healthiest)                 | 1192 (24%)        | <b>720 (30%)</b>         | <b>261 (22%)</b> | <b>169 (15%)</b> | <b>42 (11%)</b>         |
| 2nd quartile                              | 1380 (27%)        | <b>720 (30%)</b>         | <b>348 (29%)</b> | <b>230 (21%)</b> | <b>82 (22%)</b>         |
| 3rd quartile                              | 1372 (27%)        | <b>626 (26%)</b>         | <b>353 (30%)</b> | <b>303 (27%)</b> | <b>90 (24%)</b>         |
| 4th quartile (sickest)                    | 1124 (22%)        | <b>330 (14%)</b>         | <b>228 (19%)</b> | <b>408 (37%)</b> | <b>158 (42%)</b>        |
| Area Deprivation Index (ADI) <sup>c</sup> |                   |                          |                  |                  |                         |
| 1st quartile                              | 1084 (21%)        | <b>569 (24%)</b>         | <b>224 (19%)</b> | <b>215 (19%)</b> | <b>76 (20%)</b>         |
| 2nd quartile                              | 1144 (23%)        | <b>534 (22%)</b>         | <b>264 (22%)</b> | <b>261 (24%)</b> | <b>85 (23%)</b>         |
| 3rd quartile                              | 1350 (27%)        | <b>622 (26%)</b>         | <b>347 (29%)</b> | <b>274 (25%)</b> | <b>107 (29%)</b>        |
| 4th quartile                              | 1305 (26%)        | <b>599 (25%)</b>         | <b>310 (26%)</b> | <b>309 (28%)</b> | <b>87 (23%)</b>         |

<sup>a</sup> Boldface indicates statistical significance ( $p < 0.05$ ) between each risk factor and social risk Group.

<sup>b</sup> Age measured 2 years prior to study enrollment.

<sup>c</sup> The Area Deprivation Index (ADI) is missing on 4-6% of the sample.

## Supplemental Figure 1. Baseline Social Determinants of Health Assessment

1. Which racial or ethnic group do you *most* identify with?  
 African American (non-Hispanic)    American Indian or Aleut    Asian/Pacific Islanders  
 Latino or Hispanic    White (non-Hispanic)    Other (specify \_\_\_\_\_)
2. What is your marital status?  
 Married    Single/never married    Separated  
 Divorced    Unmarried couple    Widowed
- 2a. Do you consider yourself:    straight    gay or lesbian    bisexual    other
3. What is the highest level of school or degree you have completed?  
 Less than 9<sup>th</sup> grade    9<sup>th</sup> – 12<sup>th</sup> grade, **no diploma**    12<sup>th</sup> grade **with diploma**  
 GED    Vocational certificate    Some college  
 Associate's degree (AA, AS)    Bachelor's degree (BA, BS) or higher
- 3a. Are you currently a student?  
 Full-time student    Part-time Student    Not currently a student

4. At the place where you live, do you use a computer/laptop or smartphone to access the Internet?  
 A) Computer/laptop/tablet    Yes    No      B) Smartphone    Yes    No

5. Do you have a regular doctor that you see? (*annual physicals etc.*)    Yes    No

6. Do you, your family or a friend, own a car that you can use to go to the doctor?    Yes    No

7. Do you currently smoke tobacco on a daily basis, less than daily or not at all?  
 Yes, daily    Yes, less than daily    No, not at all

8. In a typical week, how many drinks containing alcohol do you have?   \_\_\_\_\_ drinks

9. Do you use any street drugs? (*not including marijuana*)    Yes    No    Refuse/Don't know

10. How much of the time, during the **PAST MONTH**, have you... (*Check one box for each question, A – F*).

|                                                               | All of the Time | Most of the Time | A Good Bit of the Time | Some of the Time | A Little of the Time | None of the Time |
|---------------------------------------------------------------|-----------------|------------------|------------------------|------------------|----------------------|------------------|
| A. Been a very nervous person?                                |                 |                  |                        |                  |                      |                  |
| B. Felt calm and peaceful?                                    |                 |                  |                        |                  |                      |                  |
| C. Felt downhearted and blue?                                 |                 |                  |                        |                  |                      |                  |
| D. Been a happy person?                                       |                 |                  |                        |                  |                      |                  |
| E. Felt so down in the dumps that nothing could cheer you up? |                 |                  |                        |                  |                      |                  |
| F. Felt lonely or isolated from those around you              |                 |                  |                        |                  |                      |                  |

11a. On average how many days per week do you do an activity that works up a sweat for at least 30 minutes? \_\_\_\_\_ days

12. Which do you usually eat more of:    Meals cooked at Home   OR    Meals Out (Restaurant, fast-food, etc.)

13. Within the past 12 months, you worried whether your food would run out before you got money to buy more. How often is this true?    Often true    Sometimes true    Never true

14. Within the past 12 months, the food you bought just didn't last and you didn't have money to buy more. How often is this true?    Often true    Sometimes true    Never true

15. Within the past 12 months, has there been a time when you/your family have been unable to pay any of the following? Please check *all* that apply.  **Gas**, electric or oil bill  **Rent** or mortgage  **Phone Bill**  **N/A**

16. How many people live with you? (*not including you*) \_\_\_ \_\_\_ (less than 18) \_\_\_ \_\_\_ \_\_\_ (greater than/equal to 18)

16 a. Have you ever been in a relationship with someone who threatened or physically hurt you?  Yes  No

16 b. If yes, was it within the past two years?  Yes  No

17. What type of housing do you live in now?

- House  Apartment  Mobile home/trailer
- Single room  Couch surfing  Shelter/transitional housing
- Hotel or motel  Homeless (**Skip to Q20**)  Other (specify \_\_\_\_\_)

18. Do you presently have any of the following problems where you live now? Please check *all* that apply (**prompt**)

- No  Rodents or bug infested  Mold
- Overcrowded  Plumbing problems/water leaks  Broken/boarded up windows
- Inadequate heating  Front door does not lock  Other (specify \_\_\_\_\_)

20. How long have you been living at your present place?

- less than 6 months  6 – 12 months  1 – 2 years  2 – 4 years  5 or more years

21. Are you worried that in the next 2 months you may NOT have stable housing?  Yes  No

22. Are you working now?

- Working full-time ( $\geq 35$  hours, 1 job) →
- Working full-time ( $\geq 35$  hours,  $\geq 2$  jobs) →
- Working part-time ( $< 35$  hours) →
- Not working

**A) When did you last work for pay?**

- < 6 months  6-12 months
- 1-2 years  2-4 years   $\geq 5$  years

**A) Do you have any of the following problems at your current job? Please check *all* that apply. (**prompt**)**

- No problems  Difficulty getting to work
- Low Wages  Don't get the support I need
- Want to work more hours  Other (specify \_\_\_\_\_)
- No health insurance benefit  No retirement benefit

**B) How long have you been working at your current job? (*longest duration job*)**

- < 6 months  6-12 months  1-2 years  2-4 years   $\geq 5$  years

23. Are you looking for work or new work?

- Yes
- No** →

**A) Why not? Please check *all* that apply (**prompt**)**

- Adequate income/ already employed  Couldn't find work  Ill health or disability
- Retired  Can't arrange child care  Transport problems
- Need training, schooling  Other (specify \_\_\_\_\_)

23a. Have you ever spent time in jail or prison?  Yes  No b) If yes, was it within the past 2 years?  Yes  No

24. Do you presently receive money from any of the following sources? (Please check *all* that apply)

- SSDI** (Disability compensation/survivors benefits from Social Security)  **Child** support
- SSI** (Supplemental Social Security for Aged, Blind and Disabled)  **Unemployment** compensation
- Temporary** Assistance for Needy Families (**TANF**)  **No**, none apply to me

25. Do you presently receive any of the following types of help? (Please check *all* that apply)

- Food** stamps (SNAP)?  **Help** paying your utility bills (LIHEAP, discounted utility fees)?
- Temporary Help** paying your rent? (ERAP) (FRSP)  **No**, none apply to me
- Housing (**Section 8 voucher/public housing/permanent supportive housing/targeted affordable housing**)
- Childcare assistance  Emergency Shelter
